# Supplementary material for: Hypoconnectivity networks in schizophrenia patients: a voxelwise meta-analysis of rs-fMRI
Source: Research Square preprint supplement (doi:10.21203/rs.3.rs-918263/v1), 2021-10-19
Supplement: Supplementary file 4 [file aa6c87585472e220f2c34464.docx]

SUPPLEMENTARY APPENDIX 2

The 11-point checklist concentrates on both clinical and neuroimaging methodology of each study and mainly assesses the quality from 3 aspects: subjects, methods for image acquisition and analysis, and results and conclusions. Each item will be matched with the study and then assigned a score of 1 (fully satisfied), 0.5 (partially satisfied), or 0 (otherwise).

Category 1: Subjects

1. Patients were evaluated prospectively, specific diagnostic criteria were applied, and demographic data were reported.

2. Healthy comparison subjects were evaluated prospectively; psychiatric and medical illnesses were excluded.

3. Important variables (e.g., age, sex, illness duration, onset time, medication status, comorbidity, severity of illness) were checked, either by stratification or statistically.

4. Sample size per group > 10.

Category 2: Methods for image acquisition and analysis

5. Magnet strength ≥ 1.5 Tesla.

6. For resting-state functional magnetic resonance imaging studies, whole brain analysis was automated with no a priori regional selection.

7. Coordinates reported in a standard space.

8. Processing of the imaging technique was described clearly enough to be reproduced.

9. Measurements were described clearly enough to be reproduced.

Category 3: Results and conclusions

10. Statistical parameters were provided for significant and important non-significant differences.

11. Conclusions were consistent with the results obtained, and the limitations were discussed.
