# Supplementary material for: Hypoconnectivity networks in schizophrenia patients: a voxelwise meta-analysis of rs-fMRI
Source: Research Square preprint supplement (doi:10.21203/rs.3.rs-918263/v1), 2021-10-19
Supplement: Supplementary file 5 [file 5a3b47fa0c322cb844a47d48.docx]

SUPPLEMENTARY APPENDIX 3

*Demographic and clinical characteristics of the included studies*

| Study | Sample size | | Mean age (years) | | % of men | | PANSS score | | | | Illness duration (months) | Type of analysis |
| --- | --- | --- | --- | --- | --- | --- | --- | --- | --- | --- | --- | --- |
| Schizophrenia | Controls | Schizophrenia | Controls | Schizophrenia | Controls | Total | Positive | Negative | General |
| Alonso1 | 19 | 20 | 40.05 | 37.75 | 68.42 | 65 |  | 17.89 | 21.47 | 34.22 | 16.11 | ALFF/fALFF |
| Alonso2 | 14 | 20 | 36.43 | 37.75 | 57.14 | 65 |  | 11.43 | 14.36 | 34.22 | 8.00 | ALFF/fALFF |
| Bai | 17 | 17 | 26.00 | 28.71 | 82.35 | 82.35 | 82.06 | 15.29 | 24.88 |  | 3.3575 | ReHo |
| Ding | 44 | 44 | 23.45 | 23.55 | 63.63 | 52.27 | 90.70 | 22.48 | 22.50 | 45.73 | 1.86 | GFC |
| Fryer | 168 | 166 | 39.04 | 37.80 | 71.43 | 75.90 | 58.78 | 15.55 | 14.49 | 38.73 |  | fALFF |
| Gao1 | 14 | 14 | 33.2 | 34.9 | 64.29 | 64.28 | 74.10 | 16.40 | 22.60 | 30.80 | 9.20 | ReHo |
| Gao2 | 17 | 29 | 31.24 | 32.73 | 58.82 | 55.17 | 97.76 | 27.53 | 21.05 | 49.12 | 14.00 | ReHo |
| Gao3 | 17 | 29 | 36.82 | 32.73 | 52.94 | 55.17 | 37.29 | 9.53 | 8.41 | 19.24 | 7.88 | ReHo |
| Gou | 28 | 21 | 23.9 | 28.8 | 57.14 | 66.67 | 85.70 | 17.80 | 21.00 | 38.90 | 1.2583 | ReHo |
| Guo1 | 49 | 50 | 22.69 | 23.48 | 61.22 | 46.00 | 91.31 | 22.27 | 22.82 |  | 1.8708 | LSFCS |
| Guo2 | 17 | 24 | 32.12 | 30.67 | 47.06 | 45.83 | 88.06 | 23.00 | 20.24 | 44.82 | 1.0025 | LSFCS |
| Guo3 | 17 | 24 | 33.12 | 30.67 | 47.06 | 45.83 | 88.06 | 23.00 | 20.24 | 44.82 | 1.0025 | VMHC |
| Li1 | 41 | 42 | 23.32 | 23.29 | 56.09 | 57.14 | 99.38 | 22.15 | 27.49 | 46.63 | 1.6792 | ALFF |
| Li2 | 42 | 42 | 22.86 | 23.29 | 59.52 | 57.14 | 86.22 | 25.38 | 16.48 | 46.63 | 1.6525 | ALFF |
| Li3 | 32 | 32 | 30.94 | 31.37 | 50.00 | 65.63 | 77.38 | 20.00 | 20.59 | 36.78 | 0.7425 | GFC |
| Liang1 | 30 | 30 | 13.00 | 12.9 | 36.67 | 46.67 | 74.50 |  |  |  | 0.4583 | ALFF |
| Liang2 | 21 | 30 | 13.2 | 12.9 | 38.09 | 46.67 | 76.40 |  |  |  | 0.45 | ALFF |
| Liao | 49 | 43 | 30.22 | 33.03 | 30.61 | 39.54 | 62.69 | 12.72 | 19.77 | 29.85 | 6.0145 | VMHC |
| Liu1 | 18 | 18 | 23.67 | 24.44 | 50.00 | 50.00 | 80.39 |  |  |  |  | ReHo |
| Liu2 | 27 | 27 | 25.44 | 27.44 | 55.56 | 66.67 | 85.78 | 21.56 | 23.15 | 41.30 | 1.5267 | ReHo/ALFF |
| Liu3 | 48 | 31 | 15.79 | 15.42 | 43.75 | 45.16 | 75.10 | 21.50 | 17.92 | 34.25 | 0.4458 | ReHo |
| Ren | 100 | 100 | 24.30 | 24.39 | 41.00 | 41.00 | 97.00 | 25.11 | 18.84 | 47.63 | 0.5208 | ALFF |
| Turner | 147 | 159 | 37.70 | 37.15 | 75.50 | 71.69 | 57.16 | 14.92 | 14.32 | 27.91 | 16.9483 | ALFF/fALFF |
| Wang | 48 | 31 | 15.79 | 15.42 | 43.75 | 45.14 | 75.10 | 21.50 | 17.92 | 34.25 | 0.4458 | LSFCS |
| Yan | 69 | 74 | 24.22 | 26.27 | 72.46 | 60.81 | 84.19 | 24.42 | 17.58 | 42.19 | 1.1450 | ReHo |
| Yu | 69 | 62 | 31.7 | 29.9 | 49.28 |  | 52.90 | 12.10 | 13.40 | 27.40 | 7.10 | ReHo |
| Zhao | 44 | 26 | 23.7 | 22.6 | 70.46 | 65.39 | 102.00 | 15.30 | 24.70 |  | 1.00 | ReHo |
| Zheng | 35 | 30 | 15.5 | 15.43 | 57.14 | 43.33 | 74.62 | 20.42 | 20.91 | 33.28 | 0.55 | ALFF |
| Zhu | 44 | 44 | 23.45 | 23.55 | 63.64 | 52.27 | 90.70 | 22.48 | 22.50 | 45.73 | 1.8617 | PAS |

ALFF: Alteration Low Frequency Fluctuations, fALFF: Fractional ALFF; ReHo: Regional Homogeneity; LSFCS: Long Short Fuctional Connectivity; VMHC: Voxel-Mirrored Homotopic Connectivity, GFC: Global Function Connectivity; PAS: Parameter of Asymetry and PANSS: Positive and Negative Syndrome Scale.
