# Supplementary material for: Hypoconnectivity networks in schizophrenia patients: a voxelwise meta-analysis of rs-fMRI
Source: Research Square preprint supplement (doi:10.21203/rs.3.rs-918263/v1), 2021-10-19
Supplement: Supplementary file 6 [file 8d5517c009af2e2646c4370f.docx]

SUPPLEMENTARY APPENDIX 1

SCOPUS:

Title: schizophreni*

AND

Title/Abstract/Keywords: fMRI OR “functional magnetic resonance imag*” OR “functional neuroimag*” OR “functional MRI” OR “functional connectivity”

AND

Title/Abstract/Keywords: “resting state” OR rest

Web Of Science:

Title: schizophreni*

AND

Topic: fMRI OR “functional magnetic resonance imag*” OR “functional neuroimag*” OR “functional MRI” OR “functional connectivity”

AND

Topic: “resting state” OR rest

Pubmed (new version):

Title: schizophreni*

AND

Title/Abstract: fMRI OR “functional magnetic resonance imag*” OR “functional neuroimag*” OR “functional MRI” OR “functional connectivity”

AND

Title/Abstract: “resting state” OR rest

Psycinfo:

Title: schizophreni*

AND

Seleccione un campo (opcional) / todos los campos: fMRI OR “functional magnetic resonance imag*” OR “functional neuroimag*” OR “functional MRI” OR “functional connectivity”

AND

Seleccione un campo (opcional) / todos los campos: “resting state” OR rest

Google Scholar:

1. allintitle: schizophrenia rsfmri -meta-analysis
2. allintitle: schizophrenia resting state -meta-analysis
3. allintitle: schizophrenia rest fmri -meta-analysis
4. allintitle: schizophrenia rest functional magnetic resonance -meta-analysis
5. allintitle: schizophrenia rest functional connectivity -meta-analysis
6. allintitle: schizophrenia rest functional mri -meta-analysis
7. allintitle: schizophrenia rest functional neuroimaging -meta-analysis
8. allintitle: schizophrenic rsfmri -meta-analysis
9. allintitle: schizophrenic resting state -meta-analysis
10. allintitle: schizophrenic rest fmri -meta-analysis
11. allintitle: schizophrenic rest functional magnetic resonance -meta-analysis
12. allintitle: schizophrenic rest functional connectivity -meta-analysis
13. allintitle: schizophrenic rest functional mri -meta-analysis
14. allintitle: schizophrenic rest functional neuroimaging -meta-analysis
